# Supplementary material for: Distribution Characteristics and Restoration Application of Vegetation in Chengcun Bay Surrounding Areas of Yangjiang City
Source: MDPI journal article supplement (doi:10.3390/ijerph191610399), 2022-08-20
Supplement: s1 [file s1]

## Supplementary Materials

### 1、coastal mangrove vegetation

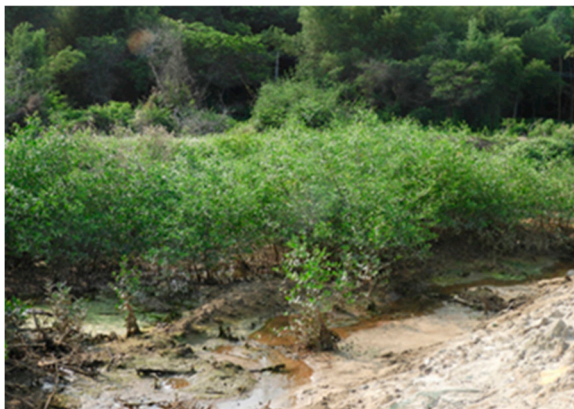

Figure S1. Hongguang Village—*Sonneratia apetala* community

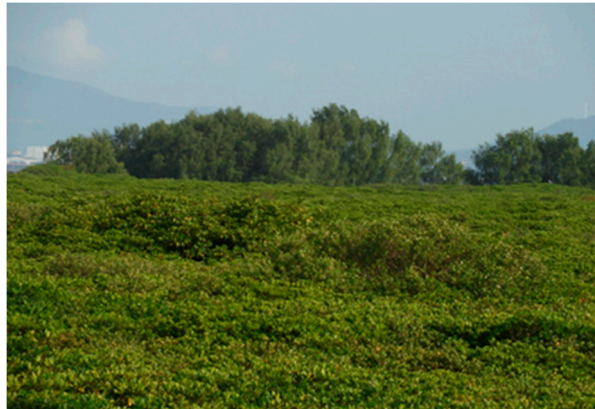

Figure S2. Hongguang Village—*Bruguiera gymnorhiza agallocha* community

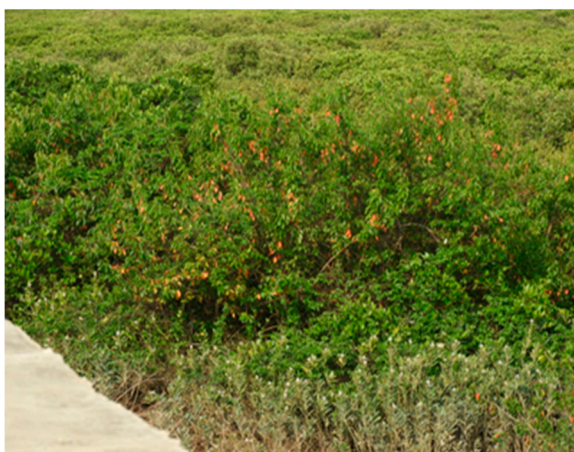

Figure S3. Hongguang Village—*Excoecaria agallocha* community

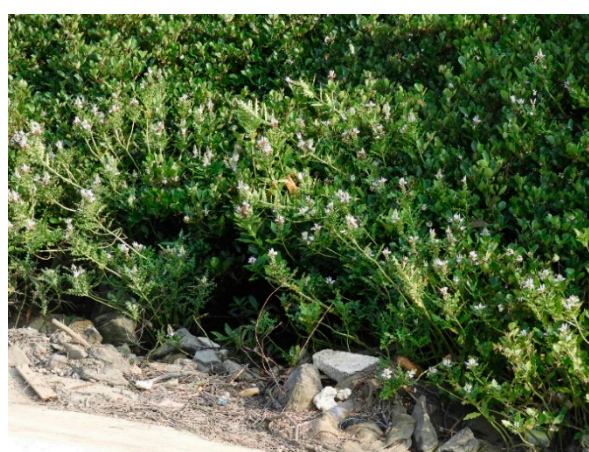

Figure S4. Hongguang Village—*Acanthus ilicifolius*

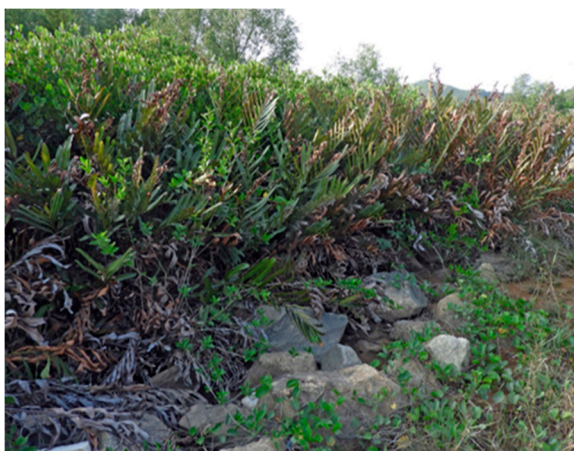

Figure S5. Shipailou Village—*Acrostichum aureum* community

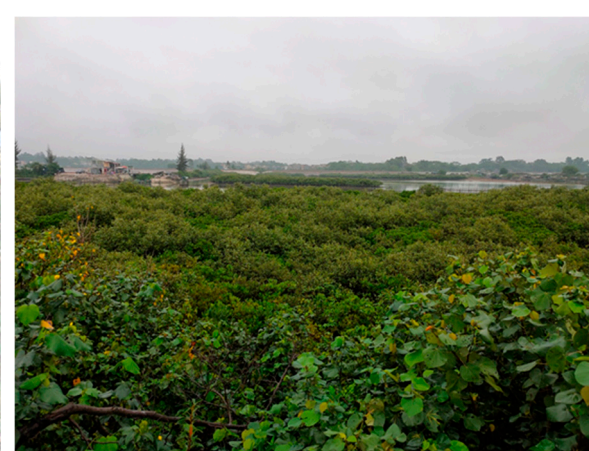

Figure S6. Mixed community of *Avicennia marina*, *Kandelia obovata* and *Hibiscus tiliaceus*

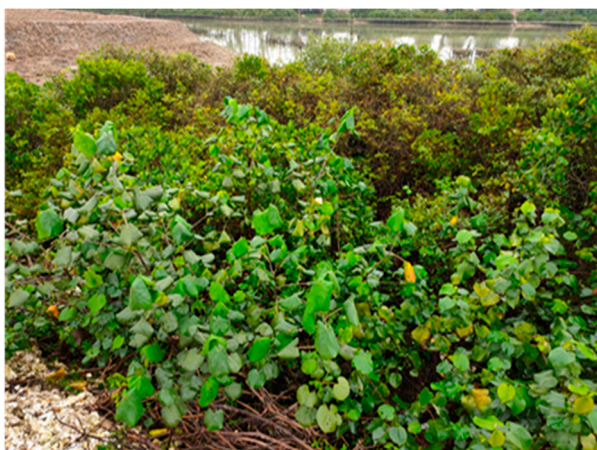

Figure S7. Mixed community of *Kandelia obovata*, *Aegiceras corniculatum* and *Hibiscus tiliaceus*

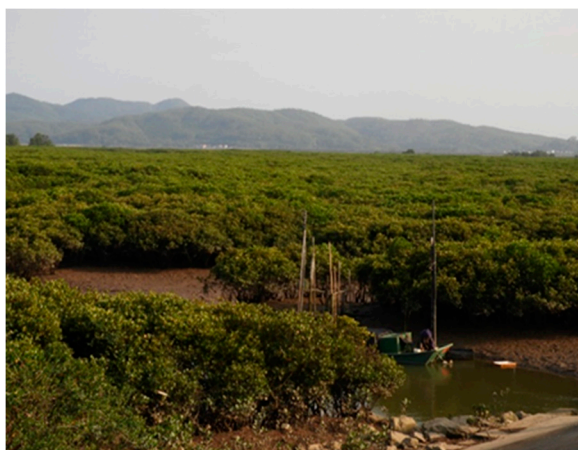

Figure S8. Hongguang Village—*Aegiceras corniculatum* community

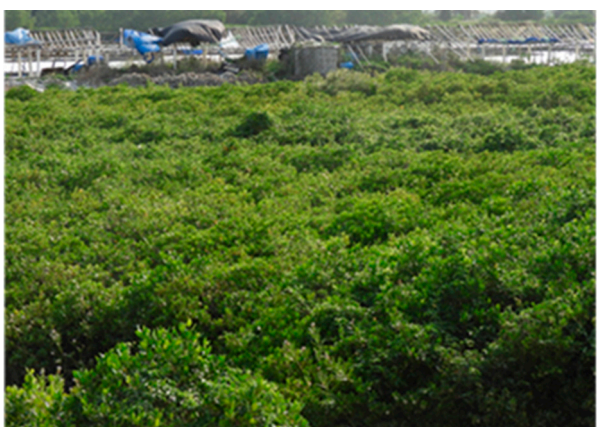

Figure S9. Haoguang Village—*K. obovata* and *A. corniculatum* community

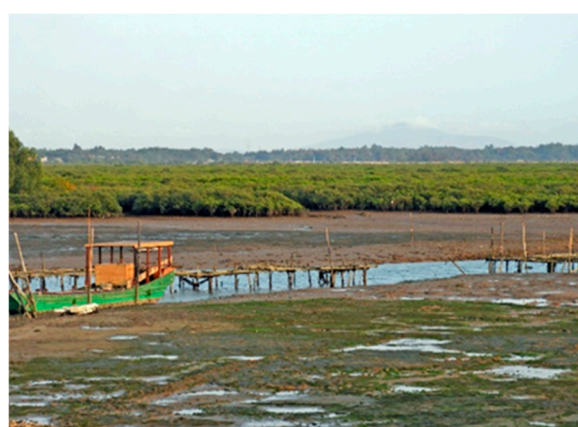

Figure S10. Shipailou Village—*A. marina* community and *A. corniculatum* community

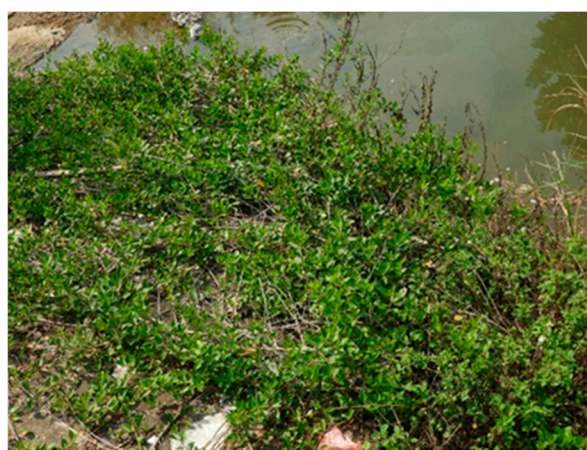

Figure S11. Haoguang Village—*Clerodendrum inerme* community

## 2、coastal sandy vegetation

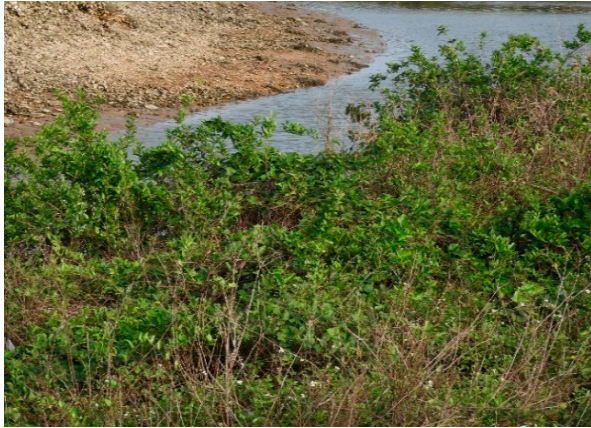

Figure S12. Hongguang Village—*Clerodendrum inerme* community

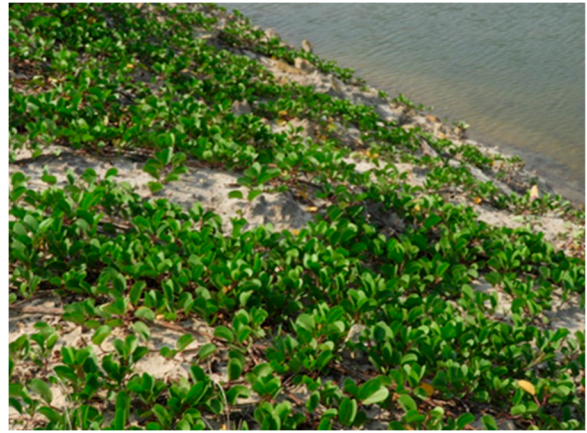

Figure S13. Hongguang Village—*Ipomoea pes-caprae* community

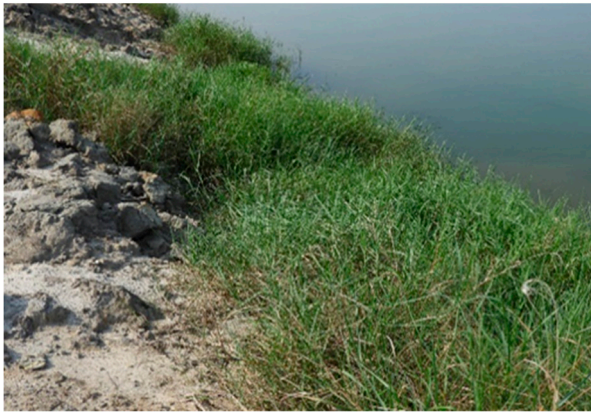

Figure S14. Haoguang Village—*Panicum repens* community

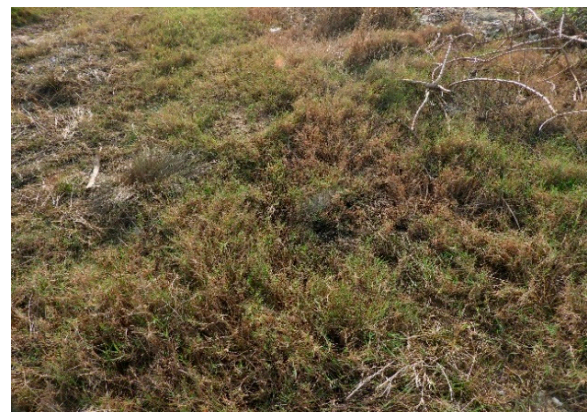

Figure S15. Hongguang Village—*Cynodon dactylon* community

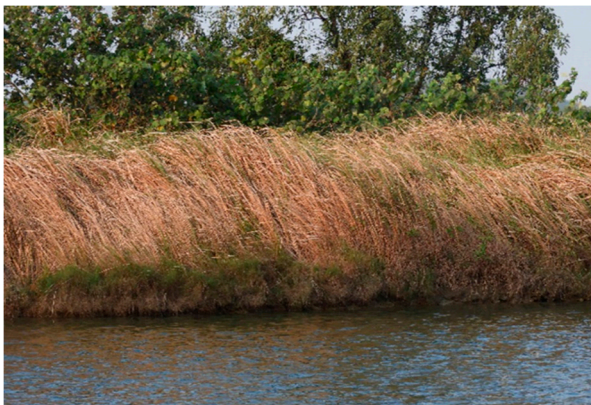

Figure S16. Shipailou Village—*Imperata cylindrica* community

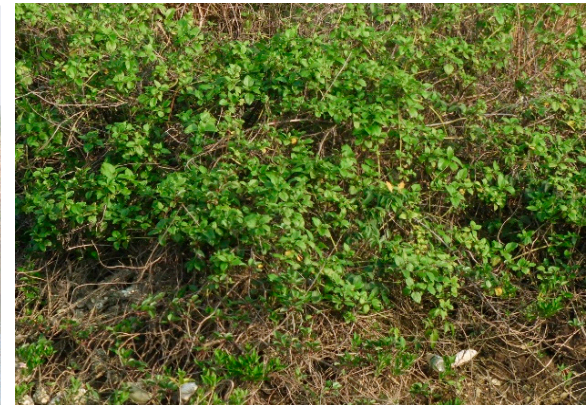

Figure S17. Hongguang Village—*Wedelia biflora* community

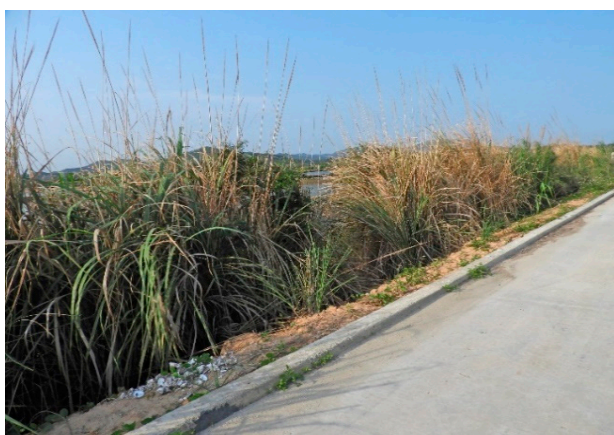

Figure S18. Hongguang Village—*Saccharum narenga* community

### 3、coastal marsh vegetation

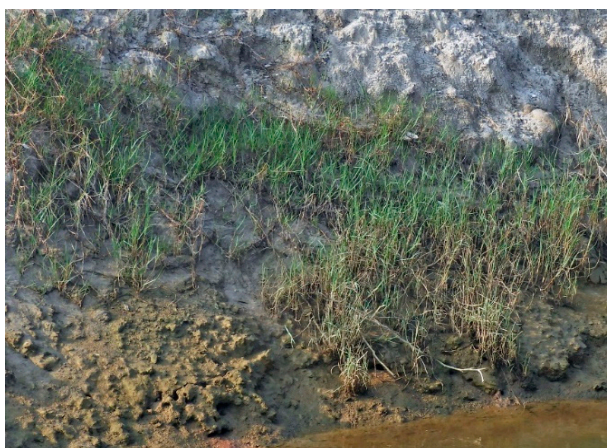

Figure S19. Hongguang Village—*Paspalum vaginatum* community

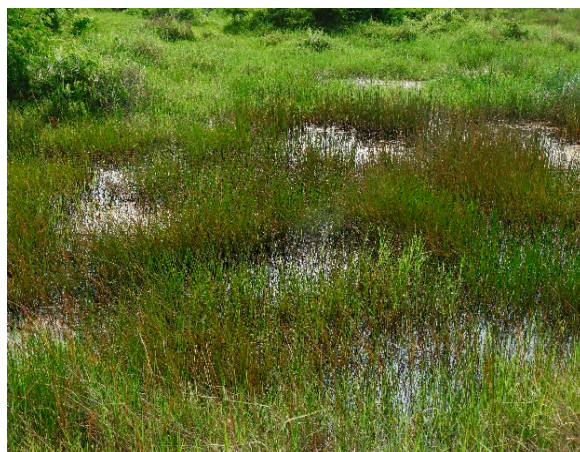

Figure S20. Haoguang Village—*Heleocharis plantagineiformis* community

### 4、coastal heterogenous shrub and grass vegetation

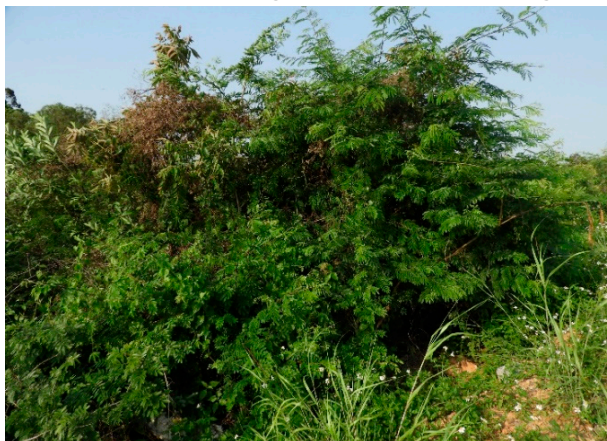

Figure S21. Hongguang Village—*Acacia farnesiana* community

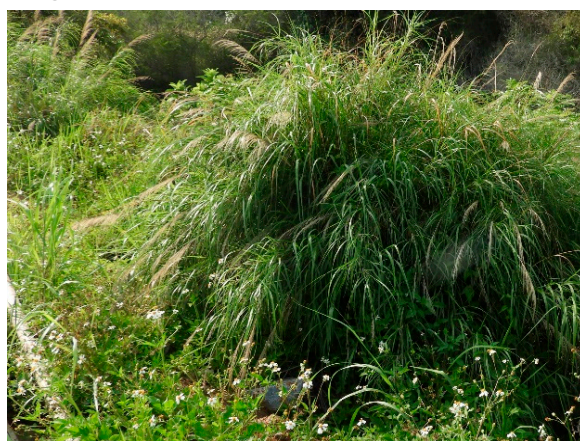

Figure S22. Hongguang Village—*Neyraudia reynaudiana* community

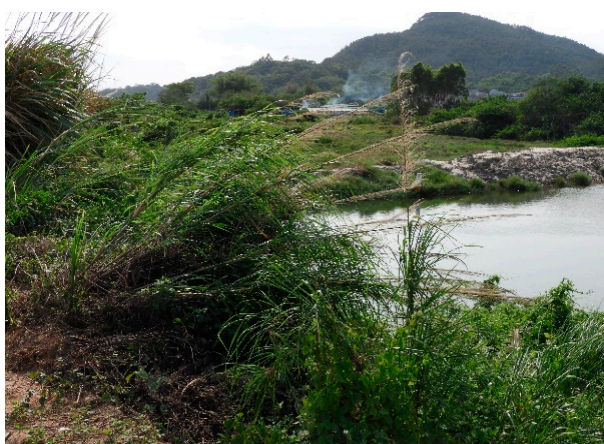

Figure S23. Haoguang Village—*Neyraudia reynaudiana* community

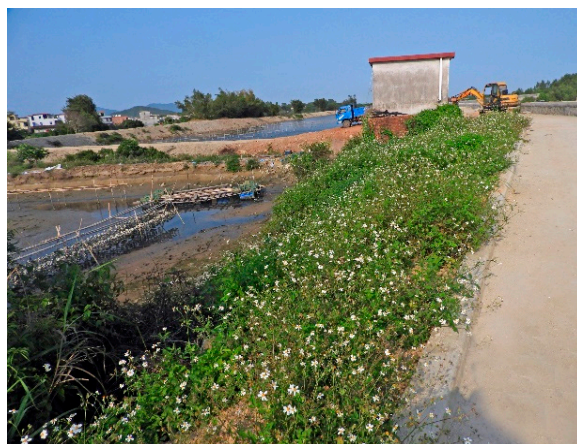

Figure S24. Haoguang Village—*Bidens pilosa* var. *Radiata* community

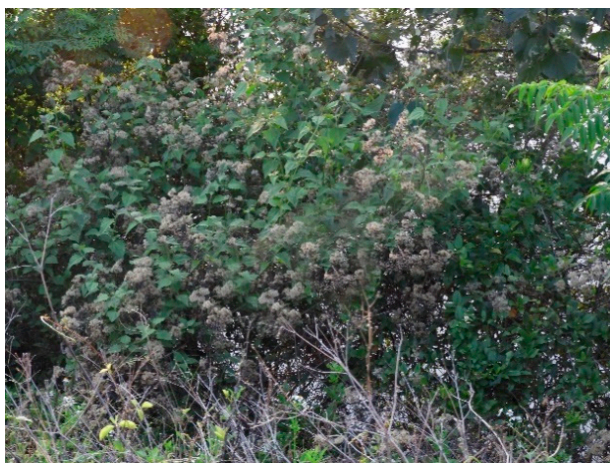

Figure S25. Shipailou Village—*Eupatorium odoratum* community

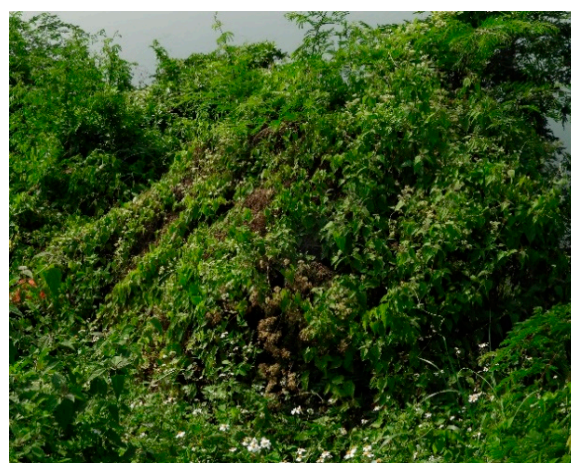

Figure S26. Haoguang Village—*Eupatorium odoratum* community

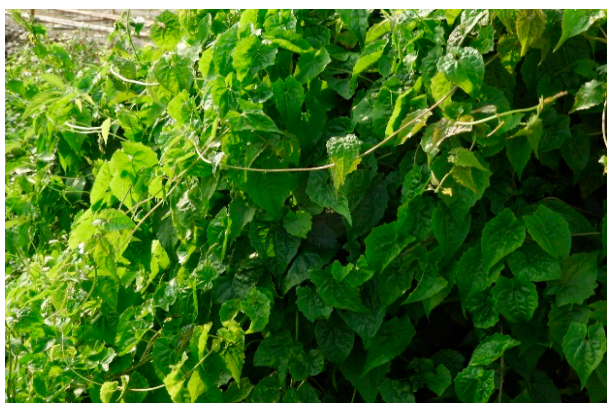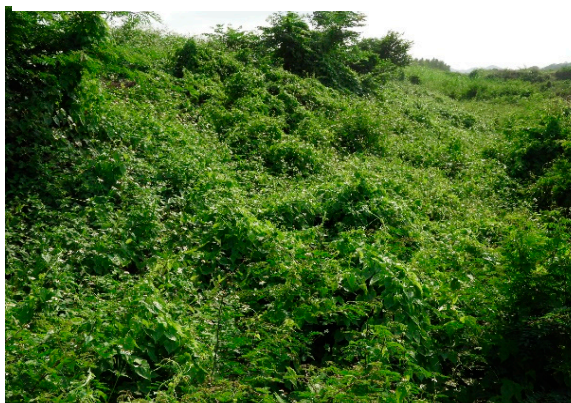

Figure S27. Haoguang Village—*Mikania micrantha* community

**Table S1. List of major coastal plant species**

| Family Name                       | Species Name                                         |
|-----------------------------------|------------------------------------------------------|
| <b>I. Phylum ferns</b>            |                                                      |
| 1. <b>Lygodiaceae</b>             | (1) <i>Lygodium japonicum</i>                        |
| 2. <b>Gleicheniaceae</b>          | (2) <i>Dicranopteris pedata</i>                      |
| 3. <b>Acrostichaceae</b>          | (3) <i>Acrostichum aureum</i>                        |
| 4. <b>Thelypteridaceae</b>        | (4) <i>Cyclosorus</i> sp.                            |
| 5. <b>Blechnaceae</b>             | (5) <i>Blechnum orientale</i>                        |
| <b>II. Phylum of seed plants</b>  |                                                      |
| <b>II-1 Subphylum gymnosperms</b> |                                                      |
| <b>II-2 Subphylum angiosperms</b> |                                                      |
| <b>II-2-1 Class Dicotyledons</b>  |                                                      |
| 6. <b>Lauraceae</b>               | (6) <i>Litsea glutinosa</i>                          |
| 7. <b>Menispermaceae</b>          | (7) <i>Cocculus orbiculatus</i>                      |
|                                   | (8) <i>Stephania longa</i>                           |
| 8. <b>Molluginiaceae</b>          | (9) <i>Portulaca oleracea</i>                        |
| 9. <b>Polygonaceae</b>            | (10) <i>Polygonum barbatum</i>                       |
|                                   | (11) <i>Polygonum hydropiper</i>                     |
|                                   | (12) <i>Polygonum chinense</i>                       |
|                                   | (13) <i>Polygonum perfoliatum</i>                    |
| 10. <b>Chenopodiaceae</b>         | (14) <i>Suaeda australis</i>                         |
| 11. <b>Amarantaceae</b>           | (15) <i>Alternanthera philoxeroides</i>              |
|                                   | (16) <i>Alternanthera sessilis</i>                   |
|                                   | (17) <i>Amaranthus viridis</i>                       |
|                                   | (18) <i>Celosia spinosus</i>                         |
| 12. <b>Oxalidaceae</b>            | (19) <i>Oxalis corniculata</i>                       |
| 13. <b>Sonneratiaceae</b>         | (20) <i>Sonneratia apetala</i>                       |
| 14. <b>Passifloraceae</b>         | (21) <i>Passiflora foetida</i>                       |
| 15. <b>Myrtaceae</b>              | (22) <i>Eucalyptus exserta</i>                       |
|                                   | (23) <i>Eucalyptus grandis</i> × <i>E. urophylla</i> |
|                                   | (24) <i>Psidium guajava</i>                          |
| 16. <b>Melastomaceae</b>          | (25) <i>Melastoma candidum</i>                       |
| 17. <b>Rhizophoraceae</b>         | (26) <i>Bruguiera gymnorhiza</i>                     |
|                                   | (27) <i>Kandelia obovata</i>                         |
| 18. <b>Malvaceae</b>              | (28) <i>Hibiscus tiliaceus</i>                       |
|                                   | (29) <i>Malvastrum coromandelianum</i>               |
|                                   | (30) <i>Sida acuta</i>                               |

|                           |                                               |
|---------------------------|-----------------------------------------------|
|                           | (31) <i>Urena lobata</i>                      |
| 19. <b>Euphorbiaceae</b>  | (32) <i>Euphorbia hirta</i>                   |
|                           | (33) <i>Excoecaria agallocha</i>              |
|                           | (34) <i>Mallotus apeltus</i>                  |
|                           | (35) <i>Ricinus communis</i>                  |
| 20. <b>Mimosaceae</b>     | (36) <i>Acacia confuse</i>                    |
|                           | (37) <i>Acacia farnesiana</i>                 |
|                           | (38) <i>Mimosa pudica</i>                     |
| 21. <b>Papilionaceae</b>  | (39) <i>Alysicarpus vaginalis</i>             |
|                           | (40) <i>Canavalia cathartica</i>              |
|                           | (41) <i>Canavalia lineata</i>                 |
|                           | (42) <i>Dalbergia candenatensis</i>           |
|                           | (43) <i>Derris trifoliata</i>                 |
|                           | (44) <i>Pongamia pinnata</i>                  |
| 22. <b>Casuarinaceae</b>  | (45) <i>Casuarina equisetifolia</i>           |
| 23. <b>Ulmaceae</b>       | (46) <i>Celtis tetrandra</i>                  |
|                           | (47) <i>Trema orientalis</i>                  |
|                           | (48) <i>Trema dielsiana</i>                   |
| 24. <b>Moraceae</b>       | (49) <i>Ficus hispida</i>                     |
| 25. <b>Urticaceae</b>     | (50) <i>Pouzolzia zeylanica</i>               |
| 26. <b>Rutaceae</b>       | (51) <i>Euodia meliaefolia</i>                |
| 27. <b>Meliaceae</b>      | (52) <i>Melia azedarach</i>                   |
| 28. <b>Sapindaceae</b>    | (53) <i>Dimocarpus longan</i>                 |
| 29. <b>Aegicerataceae</b> | (54) <i>Aegiceras corniculatum</i>            |
| 30. <b>Apocynaceae</b>    | (55) <i>Cerbera manghas</i>                   |
| 31. <b>Rubiaceae</b>      | (56) <i>Borreria articularis</i>              |
|                           | (57) <i>Paederia scandens</i>                 |
| 32. <b>Compositae</b>     | (58) <i>Aster subulatus</i>                   |
|                           | (59) <i>Bidens pilosa</i>                     |
|                           | (60) <i>Bidens pilosa</i> var. <i>radiata</i> |
|                           | (61) <i>Blumea megacephala</i>                |
|                           | (62) <i>Conyza canadensis</i>                 |
|                           | (63) <i>Conyza sumatrensi</i>                 |
|                           | (64) <i>Eupatorium odoratum</i>               |
|                           | (65) <i>Mikania micrantha</i>                 |
|                           | (66) <i>Pluchea indica</i>                    |
|                           | (67) <i>Praxelis clematidea</i>               |
|                           | (68) <i>Vernonia cinerea</i>                  |
|                           | (69) <i>Wedelia biflora</i>                   |

|                             |                                           |
|-----------------------------|-------------------------------------------|
|                             | (70) <i>Wedelia trilobata</i>             |
| 33. <b>Solanaceae</b>       | (71) <i>Solanum photeinocarpum</i>        |
| 34. <b>Convolvulaceae</b>   | (72) <i>Ipomoea pes-caprae</i>            |
| 35. <b>Acanthaceae</b>      | (73) <i>Acanthus ilicifolius</i>          |
| 36. <b>Verbenaceae</b>      | (74) <i>Avicennia marina</i>              |
|                             | (75) <i>Clerodendrum inerme</i>           |
|                             | (76) <i>Clerodendrum cyrtophyllum</i>     |
|                             | (77) <i>Phyla nodiflora</i>               |
| <b>II-2-2 Class monocot</b> |                                           |
| 37. <b>Musaceae</b>         | (78) <i>Musa acuminata</i>                |
| 38. <b>Dioscoreaceae</b>    | (79) <i>Dioscorea opposita</i>            |
| 39. <b>Cyperaceae</b>       | (80) <i>Bulbostylis barbata</i>           |
|                             | (81) <i>Cyperus rotundus</i>              |
|                             | (82) <i>Cyperus stoloniferus</i>          |
|                             | (83) <i>Fimbristylis ferrugineae</i>      |
|                             | (84) <i>Heleocharis plantagineiformis</i> |
| 40. <b>Poaceae</b>          | (85) <i>Bothriochloa bladhii</i>          |
|                             | (86) <i>Chloris barbata</i>               |
|                             | (87) <i>Chloris formosana</i>             |
|                             | (88) <i>Cynodon dactylon</i>              |
|                             | (89) <i>Dactyloctenium aegyptiacum</i>    |
|                             | (90) <i>Digitaria sanguinalis</i>         |
|                             | (91) <i>Echinochloa crusgalli</i>         |
|                             | (92) <i>Eleusine indica</i>               |
|                             | (93) <i>Imperata cylindrica</i>           |
|                             | (94) <i>Ischaemum indicum</i>             |
|                             | (95) <i>Miscanthus floridulus</i>         |
|                             | (96) <i>Neyraudia reynaudiana</i>         |
|                             | (97) <i>Panicum repens</i>                |
|                             | (98) <i>Paspalum vaginatum</i>            |
|                             | (99) <i>Pennisetum purpureum</i>          |
|                             | (100) <i>Saccharum narenga</i>            |
|                             | (101) <i>Setaria viridis</i>              |
|                             | (102) <i>Sporobolus virginicus</i>        |
